# Supplementary material for: Randomised controlled pragmatic clinical trial evaluating the effectiveness of a discharge follow-up phone call on 30-day hospital readmissions: balancing pragmatic and explanatory design considerations
Source: PubMed Central journal article supplement — BMJ Open. 2018 Feb 14;8(2):e019600. doi: 10.1136/bmjopen-2017-019600 (PMC5829894; doi:10.1136/bmjopen-2017-019600), 2018-02-14
Supplement: bmjopen-2017-019600supp001.pdf [file bmjopen-2017-019600supp001.pdf]

## Supplement I – R Code Template for Daily Patient Cohort Randomization

```
#Load Necessary Libraries
library(RCurl)
library(readr)

#Set your file path to the folder where BOR report is stored
setwd("D:/Data/Documents/Temp Work computer/FU Phone Call/Randomization")

#Will upload BOR csv corresponding to today's date
filename <- paste("discharge_report_",format(Sys.Date(), "%m-%d-%Y"),".csv", sep = "")
filename <- paste("discharge_report_", Sys.Date(),".csv", sep = "")
data <- read.csv(file = filename)

#Sets a seed based on today's date for reproducibility
set.seed(floor(as.numeric(Sys.Date())^1.5))

#Samples a random 1/2 of rows to be included in the intervention group. Will randomly round up
or down if an odd number of rows.
sample_rows <- sample(1:nrow(data), sample(c(floor(nrow(data)/2), ceiling(nrow(data)/2)), 1),
replace = F)
random_group <- rep("B", nrow(data))
random_group[sample_rows] <- "A"
data <- data.frame(data, random_group)

#Saves intervention and control patients to separate datasets
data_intervention <- data[data$random_group == 'A',]
data_control <- data[data$random_group == "B",]

#Change directory to store intervention patients in Intervention Folder
setwd("D:/Data/Documents/Temp Work computer/FU Phone Call/Randomization/Intervention")

#Saves intervention patients with date stamp
write.csv(data_intervention, file = paste("data_intervention", Sys.Date(),".csv", sep = ""),
row.names = F)

#Creates data object containing the intervention patients that can be uploaded to REDCap
Data.INT <- read_file(paste("data_intervention", Sys.Date(),".csv", sep = ""))

#Uploads data to redcap, paste API token for project 2 below
result_intervention <- postForm(
  uri='https://redcap.vanderbilt.edu/api/',
  token='0F5278ECF8493BDA2A5FB71EBE828110',
  content='record',
  format='csv',
  type='flat',
  overwriteBehavior='normal',
  data=Data.INT,
  returnContent='count',
  returnFormat='json'
)
```

```

print(result_intervention)

#Change directory to store Control patients in Control Folder
setwd("D:/Data/Documents/Temp Work computer/FU Phone Call/Randomization/Control")

#Saves control patients with date stamp
write.csv(data_control, file = paste("data_control", Sys.Date(), ".csv", sep = ""), row.names = F)

#Creates data object containing the Control patients that can be uploaded to REDCap
Data.Control <- read_file(paste("data_control", Sys.Date(), ".csv", sep = ""))

#Uploads data to redcap, paste API token for project 1 below
result_control <- postForm(
  uri='https://redcap.vanderbilt.edu/api/',
  token='6EA859FA6C7F35B11CAAAA744ADAAC48',
  content='record',
  format='csv',
  type='flat',
  overwriteBehavior='normal',
  data=Data.Control,
  returnContent='count',
  returnFormat='json'
)

print(result_control)

```

### Supplement II – Intervention Data Capture Form

#### Discharge Follow Up Phone Call

|                                                        |                                                                                                                                                                                                                            |
|--------------------------------------------------------|----------------------------------------------------------------------------------------------------------------------------------------------------------------------------------------------------------------------------|
| Editing existing Encounter Number <b>12345678901</b>   |                                                                                                                                                                                                                            |
| <b>Encounter Number</b>                                | <div style="border: 1px solid #ccc; padding: 2px; display: inline-block;"><b>12345678901</b></div><br><small>To rename the record, see the record action drop-down at top of the <a href="#">Record Home Page</a>.</small> |
| Current Date and time                                  | <div style="border: 1px solid #ccc; padding: 2px; display: inline-block;">03-17-2017 1:31 </div> <span style="margin-left: 10px;">Now</span> <small>M-D-Y H:M</small>                                                      |
| Discharge Team                                         | <div style="border: 1px solid #ccc; padding: 2px; display: inline-block;">RIVENHM1</div>                                                                                                                                   |
| Discharge Team Group                                   | <div style="border: 1px solid #ccc; padding: 2px; display: inline-block;">RIVEN</div>                                                                                                                                      |
| MRN                                                    | <div style="border: 1px solid #ccc; padding: 2px; display: inline-block;">2543577</div>                                                                                                                                    |
| Name                                                   | <div style="border: 1px solid #ccc; padding: 2px; display: inline-block;">RICH, CARLA</div>                                                                                                                                |
| BHLS                                                   | <div style="border: 1px solid #ccc; padding: 2px; display: inline-block;"> </div>                                                                                                                                          |
| Education                                              | <div style="border: 1px solid #ccc; padding: 2px; display: inline-block;"> </div>                                                                                                                                          |
| Admit Date/Time                                        | <div style="border: 1px solid #ccc; padding: 2px; display: inline-block;">03-10-2017 16:31 </div> <span style="margin-left: 10px;">Now</span> <small>M-D-Y H:M</small>                                                     |
| Discharge Date and time                                | <div style="border: 1px solid #ccc; padding: 2px; display: inline-block;">03-12-2017 1:31 </div> <span style="margin-left: 10px;">Now</span> <small>M-D-Y H:M</small>                                                      |
| Hours Since Discharge <small>(auto-calculated)</small> | <div style="border: 1px solid #ccc; padding: 2px; display: inline-block;">119</div> <span style="margin-left: 10px;"><a href="#">View equation</a></span>                                                                  |

|                                                |                                                                                                                                                                                                                                                                                                                                                                                                                                                                                                                    |
|------------------------------------------------|--------------------------------------------------------------------------------------------------------------------------------------------------------------------------------------------------------------------------------------------------------------------------------------------------------------------------------------------------------------------------------------------------------------------------------------------------------------------------------------------------------------------|
| Tele                                           | 6153851711                                                                                                                                                                                                                                                                                                                                                                                                                                                                                                         |
| PCP Name                                       | HABERMANN,                                                                                                                                                                                                                                                                                                                                                                                                                                                                                                         |
| PCP ID                                         | 2515                                                                                                                                                                                                                                                                                                                                                                                                                                                                                                               |
| Patients Preferred Language                    | ENGLISH                                                                                                                                                                                                                                                                                                                                                                                                                                                                                                            |
| Date of First Contact                          | 03-14-2017  Today <sub>M-D-Y</sub>                                                                                                                                                                                                                                                                                                                                                                                              |
| Call Attempts                                  | Not eligible                                                                                                                                                                                                                                                                                                                                                                                                                                                                                                       |
| Date of Last Contact                           | 03-17-2017  Today <sub>M-D-Y</sub>                                                                                                                                                                                                                                                                                                                                                                                            |
| Status                                         | Unsuccessful - No Answer                                                                                                                                                                                                                                                                                                                                                                                                                                                                                           |
| Interventions Delivered (check all that apply) | <input type="checkbox"/> Durable Medical Equipment<br><input type="checkbox"/> Facilitated Home Health Connection<br><input type="checkbox"/> Referral to PCP (pt instructed to call)<br><input type="checkbox"/> Referral to ED (pt instructed to go)<br><input type="checkbox"/> Case Management/Social Work assistance requested<br><input type="checkbox"/> Medication Change by Call RN<br><input type="checkbox"/> Pharmacist assistance requested<br><input type="checkbox"/> Provider assistance requested |

Notes



[Expand](#)

**Form Status**

Complete?



**Supplement III – Semi-Structured Phone Call Script and Clinical Note Template**

**Follow Up Phone Call Data Collection Form (Phone Call Starform)**

**Provider** (indexing):  (\*\*\*) This will change the provider displayed in the all documents listing of StarPanel. (\*\*\*)

**\*Standard Document Name:**  Clinical Communication  Discharge Follow-up

**Comment for Indexing (optional):**

**VANDERBILT UNIVERSITY MEDICAL CENTER  
POST DISCHARGE TELEPHONE CALL**

**Date of Discharge:**

**Patient Home Phone:**

**CALL INFO:**

|                                                                                                                     |                                             |                                                                                                                                                 |
|---------------------------------------------------------------------------------------------------------------------|---------------------------------------------|-------------------------------------------------------------------------------------------------------------------------------------------------|
| <b>Call Attempt Date and Time:</b><br><input type="text" value="01/28/2016"/><br><input type="text" value="12:12"/> | <b>Pt Location:</b><br><input type="text"/> | <input type="radio"/> <b>Call Successful</b><br><input type="radio"/> <b>Call Unsuccessful</b><br><input type="radio"/> <b>Call Unnecessary</b> |
| <b>Contact Attempts:</b><br><input type="text"/>                                                                    |                                             | <b>Phone Call Occurred with:</b><br><input type="text"/>                                                                                        |
| <b>Caller:</b><br><input type="text" value="Morrison, John"/>                                                       |                                             |                                                                                                                                                 |
| <b>Pre-Call Prep Time:</b> <input type="text"/>                                                                     |                                             |                                                                                                                                                 |
| <b>Call Duration:</b> <input type="text"/>                                                                          |                                             |                                                                                                                                                 |

**INTRODUCTION:**

Hello,  , this is  from Vanderbilt. I am calling to follow-up with you after your recent visit to our hospital. I'd like to ask you a few questions to make sure everything is going ok. This could take 10 to 15 minutes - Is this a good time to talk?

- If Yes proceed;
- If No - can you give me a time that would be better and I will call you back?

I see you were in the Hospital for [x]. How are you feeling?

**Comments:**

**DISCHARGE INSTRUCTIONS**

Click [HERE](#) for Discharge Instructions

- I want to make sure the discharge instructions we gave you were clear and understandable... Can you please tell me in your own words how you are caring for yourself at home?
- What questions do you have about your discharge instructions?
  - If none... Great - if something were to come up, what would you do to get your questions answered?
- Are you having any unusual symptoms or problems? (Specific to problem \*base this on the discharge summary\* - i.e. dressing, PAIN, bruising or swelling, N/V; e.g., *Do your favorite pair of shoes still fit?*)

|                                                    |                                                                                        |
|----------------------------------------------------|----------------------------------------------------------------------------------------|
| Patient can teach back self-care                   | <input type="radio"/> Yes<br><input type="radio"/> No<br><input type="radio"/> Partial |
| Provider contacted for pain/symptoms/complications | <input type="radio"/> Yes<br><input type="radio"/> No                                  |

**Comments:**

**FOLLOW-UP APPOINTMENT**

- When is your follow-up appointment?

Follow-up appointment change made based on this call

- Yes
- No

Able to teach back follow-up appointment related to hospitalization

- Yes
- No

**Comments:**

**MEDICATIONS:**

\*Are new prescriptions identified on the discharge summary?

- **Yes** –
  - I see you have [number] new medicines from your hospital visit. How are you tolerating taking your [medication]? (follow protocol if you find patient has not filled prescriptions)
  - Would you talk through your daily plan for taking all your medicines
  - What questions do you have about your medicines
- **No** –
  - I see we didn't prescribe any new medicines when you left the hospital. Is that still correct?
  - Yes: Great – do you take any other medicines on a regular basis?
    - Would you talk through your daily plan for taking your medicines?
    - Do you have any questions about your medicines?
  - No: Ok, what medicines did you get? How are you tolerating taking your new medicines?
    - Would you talk through your daily plan for taking your new medicines and any others you take on a regular basis?
    - What questions do you have about your medicines?

Able to teach back medications

- Yes
- No



|                                                               |                                                                                        |
|---------------------------------------------------------------|----------------------------------------------------------------------------------------|
| Has obtained medications prescribed at discharge              | <input type="radio"/> Yes<br><input type="radio"/> No<br><input type="radio"/> Partial |
| Medication education or clarification was needed              | <input type="radio"/> Yes<br><input type="radio"/> No                                  |
| Medication change made by caller/provider based on phone call | <input type="radio"/> Yes<br><input type="radio"/> No                                  |
| <b>Comments:</b><br><div data-bbox="201 646 657 745"></div>   |                                                                                        |

Meds Editor: (Click to expand/collapse)

Save Undo All Refresh New User Feedback Tutorial

Set 'No Current Medications'

Actions Help

| #  | Name                                                                                                                                                                                           | Note | Start Dt     |
|----|------------------------------------------------------------------------------------------------------------------------------------------------------------------------------------------------|------|--------------|
| 1  | Medrol (Pak) take it as directed for 6 days with food                                                                                                                                          |      | Click to Set |
| 2  | Lasix 40mg tablet One tablet by mouth daily                                                                                                                                                    |      | Click to Set |
| 3  | Tylenol Children's 2 x per day                                                                                                                                                                 |      | Click to Set |
| 4  | hydrocodone 10 mg-chlorpheniramine 8 mg/5 mL oral susp extend.rel 12hr (Also Known As Tussionex Pennkinetic ER) 5 milliliters by mouth every evening at bedtime for 7 days as needed for COUGH |      | Click to Set |
| 5  | lisinopril 10mg twice daily                                                                                                                                                                    |      | Click to Set |
| 6  | bupropion HCl XL 150 mg 24 hr tablet, extended release (Also Known As Wellbutrin XL) 1 tablet by mouth daily                                                                                   |      | Click to Set |
| 7  | NP Thyroid 60 mg tablet 1 tablet sublingual daily for 6 months                                                                                                                                 |      | Click to Set |
| 8  | metoprolol tartrate 25mg 1 tab by mouth twice daily (once in am and once in the evening)                                                                                                       |      | Click to Set |
| 9  | prednisolone acetate 1 % eye drops,suspension 1 drop in the right eye three times a day                                                                                                        |      | Click to Set |
| 10 | lisinopril 10 mg tablet 1 tablet by mouth daily                                                                                                                                                |      | Click to Set |
| 11 | penicillin V potassium 250 mg tablet 3 tablets by mouth twice a day for 10 days                                                                                                                |      | Click to Set |
| 12 | prednisolone acetate 1 % eye drops,suspension 1 drop in the left eye with each snack for 10 days                                                                                               |      | Click to Set |
| 13 | sulfamethoxazole 400 mg-trimethoprim 80 mg/5 mL intravenous solution 0.3 milliliters intravenously every 6 hours for 14 days                                                                   |      | Click to Set |
| 14 | Infant Non-ASA 1                                                                                                                                                                               |      | Click to Set |
| 15 | prednisolone acetate 1 % eye drops,suspension 1 drop in the left eye with dinner for 14 days                                                                                                   |      | Click to Set |
| 16 | Pepcid AC 20 mg daily by mouth for 1 year                                                                                                                                                      |      | Click to Set |
| 17 | amoxicillin one a day                                                                                                                                                                          |      | Click to Set |
| 18 | Pepcid AC 20 mg daily by mouth for 1 year                                                                                                                                                      |      | Click to Set |
| 19 | amoxicillin one a day                                                                                                                                                                          |      | Click to Set |
| 20 | atenolol 1600mg daily                                                                                                                                                                          |      | Click to Set |
| 21 | digoxin 125 mg , 2 tabs by mouth each morning                                                                                                                                                  |      | Click to Set |

Save Undo All Refresh New User Feedback Tutorial

Set 'No Current Medications'

Med Name:  Sig:

**CLOSING:**

- Thank you for talking with me. We are always trying to get better at giving excellent care. Is there one thing that comes to mind for you that we can improve on?
- You will be getting a survey in the mail asking about your experience during your hospital stay. We would appreciate you taking the time to give us your feedback. It is very important to us and should only take you about five minutes.
- Do you need anything from us right now?
  - Ok we wish you all the best in your recovery. If you need anything, please contact us at [phone number]

**Comments:**



Save As Draft

Complete

Form: post\_discharge\_telephone\_call (Post Discharge Telephone Call)  
Version: 2.4  
Last modified: \$Date: 2015/12/21 18:22:48 \$
